# Supplementary material for: Base pair probability estimates improve the prediction accuracy of RNA non-canonical base pairs
Source: PubMed Central journal article supplement (PMC5690697; doi:10.1371/journal.pcbi.1005827), 2017-11-06
Supplement: pcbi.1005827.s005.pdf [file pcbi.1005827.s005.pdf]

Supporting Table S4: Statistical comparison of CycleFold partition function against energy minimization algorithms for canonical pairs. If  $p < 0.05$ , the name of the program with significantly higher performance is provided.

| program 1 | program 2             | metric                | Significantly better performer | p value   |
|-----------|-----------------------|-----------------------|--------------------------------|-----------|
| Fold      | CycleFold_thresholded | PPV(threshold 0.5)    | none                           | 1.026E-01 |
| Fold      | CycleFold_thresholded | sens.(threshold 0.5)  | none                           | 2.887E-01 |
| Fold      | CycleFold_thresholded | PPV(threshold 0.6)    | none                           | 3.182E-01 |
| Fold      | CycleFold_thresholded | sens.(threshold 0.6)  | Fold                           | 4.357E-02 |
| Fold      | CycleFold_thresholded | PPV(threshold 0.7)    | none                           | 9.952E-01 |
| Fold      | CycleFold_thresholded | sens.(threshold 0.7)  | Fold                           | 1.172E-03 |
| Fold      | CycleFold_thresholded | PPV(threshold 0.8)    | none                           | 4.172E-01 |
| Fold      | CycleFold_thresholded | sens.(threshold 0.8)  | Fold                           | 1.727E-06 |
| Fold      | CycleFold_thresholded | PPV(threshold 0.85)   | none                           | 5.663E-01 |
| Fold      | CycleFold_thresholded | sens.(threshold 0.85) | Fold                           | 1.508E-10 |
| Fold      | CycleFold_thresholded | PPV(threshold 0.9)    | none                           | 2.457E-01 |
| Fold      | CycleFold_thresholded | sens.(threshold 0.9)  | Fold                           | 1.499E-17 |
| Fold      | CycleFold_thresholded | PPV(threshold 0.95)   | none                           | 1.815E-01 |
| Fold      | CycleFold_thresholded | sens.(threshold 0.95) | Fold                           | 2.932E-26 |
| Fold      | CycleFold_thresholded | PPV(threshold 0.99)   | none                           | 7.489E-01 |
| Fold      | CycleFold_thresholded | sens.(threshold 0.99) | Fold                           | 2.179E-60 |
| MC-Fold   | CycleFold_thresholded | PPV(threshold 0.5)    | CycleFold_thresholded          | 8.110E-03 |
| MC-Fold   | CycleFold_thresholded | sens.(threshold 0.5)  | MC-Fold                        | 1.496E-02 |
| MC-Fold   | CycleFold_thresholded | PPV(threshold 0.6)    | CycleFold_thresholded          | 4.516E-03 |
| MC-Fold   | CycleFold_thresholded | sens.(threshold 0.6)  | MC-Fold                        | 1.019E-04 |
| MC-Fold   | CycleFold_thresholded | PPV(threshold 0.7)    | CycleFold_thresholded          | 4.421E-04 |
| MC-Fold   | CycleFold_thresholded | sens.(threshold 0.7)  | MC-Fold                        | 2.848E-08 |
| MC-Fold   | CycleFold_thresholded | PPV(threshold 0.8)    | CycleFold_thresholded          | 1.870E-05 |

|            |                       |                       |                       |           |
|------------|-----------------------|-----------------------|-----------------------|-----------|
| MC-Fold    | CycleFold_thresholded | sens.(threshold 0.8)  | MC-Fold               | 1.378E-13 |
| MC-Fold    | CycleFold_thresholded | PPV(threshold 0.85)   | CycleFold_thresholded | 1.283E-05 |
| MC-Fold    | CycleFold_thresholded | sens.(threshold 0.85) | MC-Fold               | 1.122E-18 |
| MC-Fold    | CycleFold_thresholded | PPV(threshold 0.9)    | CycleFold_thresholded | 2.047E-05 |
| MC-Fold    | CycleFold_thresholded | sens.(threshold 0.9)  | MC-Fold               | 1.554E-22 |
| MC-Fold    | CycleFold_thresholded | PPV(threshold 0.95)   | CycleFold_thresholded | 2.376E-06 |
| MC-Fold    | CycleFold_thresholded | sens.(threshold 0.95) | MC-Fold               | 4.063E-29 |
| MC-Fold    | CycleFold_thresholded | PPV(threshold 0.99)   | CycleFold_thresholded | 9.419E-04 |
| MC-Fold    | CycleFold_thresholded | sens.(threshold 0.99) | MC-Fold               | 2.112E-59 |
| MC-Fold-DP | CycleFold_thresholded | PPV(threshold 0.5)    | none                  | 2.697E-01 |
| MC-Fold-DP | CycleFold_thresholded | sens.(threshold 0.5)  | none                  | 9.004E-01 |
| MC-Fold-DP | CycleFold_thresholded | PPV(threshold 0.6)    | none                  | 1.627E-01 |
| MC-Fold-DP | CycleFold_thresholded | sens.(threshold 0.6)  | none                  | 1.816E-01 |
| MC-Fold-DP | CycleFold_thresholded | PPV(threshold 0.7)    | CycleFold_thresholded | 1.896E-02 |
| MC-Fold-DP | CycleFold_thresholded | sens.(threshold 0.7)  | MC-Fold-DP            | 2.699E-03 |
| MC-Fold-DP | CycleFold_thresholded | PPV(threshold 0.8)    | CycleFold_thresholded | 1.805E-02 |
| MC-Fold-DP | CycleFold_thresholded | sens.(threshold 0.8)  | MC-Fold-DP            | 1.443E-05 |
| MC-Fold-DP | CycleFold_thresholded | PPV(threshold 0.85)   | CycleFold_thresholded | 1.634E-02 |
| MC-Fold-DP | CycleFold_thresholded | sens.(threshold 0.85) | MC-Fold-DP            | 1.200E-09 |
| MC-Fold-DP | CycleFold_thresholded | PPV(threshold 0.9)    | none                  | 6.162E-02 |
| MC-Fold-DP | CycleFold_thresholded | sens.(threshold 0.9)  | MC-Fold-DP            | 2.820E-14 |
| MC-Fold-DP | CycleFold_thresholded | PPV(threshold 0.95)   | CycleFold_thresholded | 6.915E-03 |
| MC-Fold-DP | CycleFold_thresholded | sens.(threshold 0.95) | MC-Fold-DP            | 4.011E-20 |
| MC-Fold-DP | CycleFold_thresholded | PPV(threshold 0.99)   | none                  | 1.104E-01 |
| MC-Fold-DP | CycleFold_thresholded | sens.(threshold 0.99) | MC-Fold-DP            | 2.877E-43 |
| CycleFold  | CycleFold_thresholded | PPV(threshold 0.5)    | CycleFold_thresholded | 4.782E-03 |
| CycleFold  | CycleFold_thresholded | sens.(threshold 0.5)  | CycleFold             | 5.445E-03 |

|           |                       |                       |                       |           |
|-----------|-----------------------|-----------------------|-----------------------|-----------|
| CycleFold | CycleFold_thresholded | PPV(threshold 0.6)    | CycleFold_thresholded | 1.733E-03 |
| CycleFold | CycleFold_thresholded | sens.(threshold 0.6)  | CycleFold             | 2.949E-06 |
| CycleFold | CycleFold_thresholded | PPV(threshold 0.7)    | CycleFold_thresholded | 7.163E-05 |
| CycleFold | CycleFold_thresholded | sens.(threshold 0.7)  | CycleFold             | 1.131E-09 |
| CycleFold | CycleFold_thresholded | PPV(threshold 0.8)    | CycleFold_thresholded | 2.726E-07 |
| CycleFold | CycleFold_thresholded | sens.(threshold 0.8)  | CycleFold             | 4.398E-13 |
| CycleFold | CycleFold_thresholded | PPV(threshold 0.85)   | CycleFold_thresholded | 2.402E-07 |
| CycleFold | CycleFold_thresholded | sens.(threshold 0.85) | CycleFold             | 1.456E-17 |
| CycleFold | CycleFold_thresholded | PPV(threshold 0.9)    | CycleFold_thresholded | 1.777E-05 |
| CycleFold | CycleFold_thresholded | sens.(threshold 0.9)  | CycleFold             | 2.948E-22 |
| CycleFold | CycleFold_thresholded | PPV(threshold 0.95)   | CycleFold_thresholded | 3.914E-06 |
| CycleFold | CycleFold_thresholded | sens.(threshold 0.95) | CycleFold             | 4.569E-29 |
| CycleFold | CycleFold_thresholded | PPV(threshold 0.99)   | CycleFold_thresholded | 6.727E-04 |
| CycleFold | CycleFold_thresholded | sens.(threshold 0.99) | CycleFold             | 2.347E-61 |
