# Supplementary material for: Base pair probability estimates improve the prediction accuracy of RNA non-canonical base pairs
Source: PubMed Central journal article supplement (PMC5690697; doi:10.1371/journal.pcbi.1005827), 2017-11-06
Supplement: pcbi.1005827.s007.pdf [file pcbi.1005827.s007.pdf]

Supporting Table S6: Statistical comparison of CycleFold partition function against energy minimization algorithms for non-canonical pairs. If  $p < 0.05$ , the name of the program with significantly higher performance is provided. For p value, nan (not a number) appears when the PPV was undefined for one or two programs.

| program 1  | program 2             | metric                | Significantly better performer | p value   |
|------------|-----------------------|-----------------------|--------------------------------|-----------|
| MC-Fold    | CycleFold_thresholded | PPV(threshold 0.5)    | none                           | 6.368E-02 |
| MC-Fold    | CycleFold_thresholded | sens.(threshold 0.5)  | MC-Fold                        | 2.435E-02 |
| MC-Fold    | CycleFold_thresholded | PPV(threshold 0.6)    | none                           | 2.682E-01 |
| MC-Fold    | CycleFold_thresholded | sens.(threshold 0.6)  | MC-Fold                        | 3.806E-03 |
| MC-Fold    | CycleFold_thresholded | PPV(threshold 0.7)    | none                           | 5.762E-01 |
| MC-Fold    | CycleFold_thresholded | sens.(threshold 0.7)  | MC-Fold                        | 5.699E-05 |
| MC-Fold    | CycleFold_thresholded | PPV(threshold 0.8)    | none                           | 7.481E-01 |
| MC-Fold    | CycleFold_thresholded | sens.(threshold 0.8)  | MC-Fold                        | 9.125E-07 |
| MC-Fold    | CycleFold_thresholded | PPV(threshold 0.85)   | none                           | 7.498E-01 |
| MC-Fold    | CycleFold_thresholded | sens.(threshold 0.85) | MC-Fold                        | 3.358E-08 |
| MC-Fold    | CycleFold_thresholded | PPV(threshold 0.9)    | none                           | 6.952E-01 |
| MC-Fold    | CycleFold_thresholded | sens.(threshold 0.9)  | MC-Fold                        | 9.036E-10 |
| MC-Fold    | CycleFold_thresholded | PPV(threshold 0.95)   | none                           | nan       |
| MC-Fold    | CycleFold_thresholded | sens.(threshold 0.95) | MC-Fold                        | 8.912E-11 |
| MC-Fold    | CycleFold_thresholded | PPV(threshold 0.99)   | none                           | nan       |
| MC-Fold    | CycleFold_thresholded | sens.(threshold 0.99) | MC-Fold                        | 5.389E-12 |
| MC-Fold-DP | CycleFold_thresholded | PPV(threshold 0.5)    | none                           | 3.415E-01 |
| MC-Fold-DP | CycleFold_thresholded | sens.(threshold 0.5)  | MC-Fold-DP                     | 4.405E-05 |
| MC-Fold-DP | CycleFold_thresholded | PPV(threshold 0.6)    | none                           | 9.514E-01 |
| MC-Fold-DP | CycleFold_thresholded | sens.(threshold 0.6)  | MC-Fold-DP                     | 2.296E-06 |
| MC-Fold-DP | CycleFold_thresholded | PPV(threshold 0.7)    | none                           | 6.234E-01 |
| MC-Fold-DP | CycleFold_thresholded | sens.(threshold 0.7)  | MC-Fold-DP                     | 3.837E-08 |
| MC-Fold-DP | CycleFold_thresholded | PPV(threshold 0.8)    | none                           | 6.215E-01 |

|                       |                       |                       |                       |           |
|-----------------------|-----------------------|-----------------------|-----------------------|-----------|
| MC-Fold-DP            | CycleFold_thresholded | sens.(threshold 0.8)  | MC-Fold-DP            | 1.682E-09 |
| MC-Fold-DP            | CycleFold_thresholded | PPV(threshold 0.85)   | none                  | 6.237E-01 |
| MC-Fold-DP            | CycleFold_thresholded | sens.(threshold 0.85) | MC-Fold-DP            | 2.137E-11 |
| MC-Fold-DP            | CycleFold_thresholded | PPV(threshold 0.9)    | none                  | 9.164E-01 |
| MC-Fold-DP            | CycleFold_thresholded | sens.(threshold 0.9)  | MC-Fold-DP            | 1.166E-13 |
| MC-Fold-DP            | CycleFold_thresholded | PPV(threshold 0.95)   | none                  | nan       |
| MC-Fold-DP            | CycleFold_thresholded | sens.(threshold 0.95) | MC-Fold-DP            | 3.580E-15 |
| MC-Fold-DP            | CycleFold_thresholded | PPV(threshold 0.99)   | none                  | nan       |
| MC-Fold-DP            | CycleFold_thresholded | sens.(threshold 0.99) | MC-Fold-DP            | 3.732E-17 |
| CycleFold             | CycleFold_thresholded | PPV(threshold 0.5)    | none                  | 4.042E-01 |
| CycleFold             | CycleFold_thresholded | sens.(threshold 0.5)  | CycleFold             | 3.014E-03 |
| CycleFold             | CycleFold_thresholded | PPV(threshold 0.6)    | none                  | 4.589E-01 |
| CycleFold             | CycleFold_thresholded | sens.(threshold 0.6)  | CycleFold             | 2.800E-04 |
| CycleFold             | CycleFold_thresholded | PPV(threshold 0.7)    | none                  | 2.724E-01 |
| CycleFold             | CycleFold_thresholded | sens.(threshold 0.7)  | CycleFold             | 8.255E-06 |
| CycleFold             | CycleFold_thresholded | PPV(threshold 0.8)    | none                  | 6.215E-01 |
| CycleFold             | CycleFold_thresholded | sens.(threshold 0.8)  | CycleFold             | 5.892E-07 |
| CycleFold             | CycleFold_thresholded | PPV(threshold 0.85)   | none                  | 6.237E-01 |
| CycleFold             | CycleFold_thresholded | sens.(threshold 0.85) | CycleFold             | 2.056E-08 |
| CycleFold             | CycleFold_thresholded | PPV(threshold 0.9)    | none                  | 9.164E-01 |
| CycleFold             | CycleFold_thresholded | sens.(threshold 0.9)  | CycleFold             | 4.936E-10 |
| CycleFold             | CycleFold_thresholded | PPV(threshold 0.95)   | none                  | nan       |
| CycleFold             | CycleFold_thresholded | sens.(threshold 0.95) | CycleFold             | 4.589E-11 |
| CycleFold             | CycleFold_thresholded | PPV(threshold 0.99)   | none                  | nan       |
| CycleFold             | CycleFold_thresholded | sens.(threshold 0.99) | CycleFold             | 2.510E-12 |
| CycleFold_constrained | CycleFold_thresholded | PPV(threshold 0.5)    | none                  | 4.801E-01 |
| CycleFold_constrained | CycleFold_thresholded | sens.(threshold 0.5)  | CycleFold_constrained | 4.737E-05 |

|                       |                       |                       |                       |           |
|-----------------------|-----------------------|-----------------------|-----------------------|-----------|
| CycleFold_constrained | CycleFold_thresholded | PPV(threshold 0.6)    | none                  | 5.583E-01 |
| CycleFold_constrained | CycleFold_thresholded | sens.(threshold 0.6)  | CycleFold_constrained | 4.071E-06 |
| CycleFold_constrained | CycleFold_thresholded | PPV(threshold 0.7)    | none                  | 1.214E-01 |
| CycleFold_constrained | CycleFold_thresholded | sens.(threshold 0.7)  | CycleFold_constrained | 9.653E-08 |
| CycleFold_constrained | CycleFold_thresholded | PPV(threshold 0.8)    | none                  | 5.770E-01 |
| CycleFold_constrained | CycleFold_thresholded | sens.(threshold 0.8)  | CycleFold_constrained | 5.678E-09 |
| CycleFold_constrained | CycleFold_thresholded | PPV(threshold 0.85)   | none                  | 5.795E-01 |
| CycleFold_constrained | CycleFold_thresholded | sens.(threshold 0.85) | CycleFold_constrained | 8.501E-11 |
| CycleFold_constrained | CycleFold_thresholded | PPV(threshold 0.9)    | none                  | 1.000E+00 |
| CycleFold_constrained | CycleFold_thresholded | sens.(threshold 0.9)  | CycleFold_constrained | 5.610E-13 |
| CycleFold_constrained | CycleFold_thresholded | PPV(threshold 0.95)   | none                  | nan       |
| CycleFold_constrained | CycleFold_thresholded | sens.(threshold 0.95) | CycleFold_constrained | 2.010E-14 |
| CycleFold_constrained | CycleFold_thresholded | PPV(threshold 0.99)   | none                  | nan       |
| CycleFold_constrained | CycleFold_thresholded | sens.(threshold 0.99) | CycleFold_constrained | 2.578E-16 |
