# Supplementary material for: Base pair probability estimates improve the prediction accuracy of RNA non-canonical base pairs
Source: PubMed Central journal article supplement (PMC5690697; doi:10.1371/journal.pcbi.1005827), 2017-11-06
Supplement: pcbi.1005827.s009.pdf [file pcbi.1005827.s009.pdf]

Supporting Table S8: Statistical comparison of performance between CycleFold-TurboFold and plmc. If  $p < 0.05$ , the name of the program with significantly higher performance is provided.

| program 1 | Program 2 | metric                | Significantly better performer | P value |
|-----------|-----------|-----------------------|--------------------------------|---------|
| CycleFold | plmc      | PPV(canonical)        | CycleFold                      | 0.00278 |
| CycleFold | plmc      | Sens. (canonical)     | none                           | 0.360   |
| CycleFold | plmc      | PPV (non-canonical)   | none                           | 0.0998  |
| CycleFold | plmc      | Sens. (non-canonical) | none                           | 0.149   |
