# Supplementary material for: Base pair probability estimates improve the prediction accuracy of RNA non-canonical base pairs
Source: PLOS journal article supplement (doi:10.1371/journal.pcbi.1005827), 2017-11-06
Supplement: S3 (10.1371/journal.pcbi.1005827.s003) [file journal.pcbi.1005827.s003]

Supporting Table S2: Performance of structure prediction methods.

Supporting Table S2A: Mean PPV and sensitivity for CycleFold. The MFE performance has a single row. The partition function performance is shown as a function of probability threshold. Constrained indicates that the known canonical pairs were constrained.

| Threshold | CycleFold canonical<br>PPV | CycleFold canonical<br>sens. | CycleFold constrained non-<br>canonical PPV | CycleFold constrained non-<br>canonical sens. | CycleFold non-<br>canonical<br>PPV | CycleFold non-<br>canonical<br>sens. |
|-----------|----------------------------|------------------------------|---------------------------------------------|-----------------------------------------------|------------------------------------|--------------------------------------|
| MFE       | 0.819                      | 0.863                        | 0.592                                       | 0.768                                         | 0.470                              | 0.640                                |
| 0.1       | 0.769                      | 1.012                        | 0.468                                       | 1.076                                         | 0.426                              | 1.040                                |
| 0.2       | 0.803                      | 0.955                        | 0.522                                       | 0.937                                         | 0.519                              | 0.913                                |
| 0.3       | 0.812                      | 0.912                        | 0.561                                       | 0.936                                         | 0.521                              | 0.760                                |
| 0.4       | 0.824                      | 0.876                        | 0.642                                       | 0.851                                         | 0.563                              | 0.623                                |
| 0.5       | 0.836                      | 0.818                        | 0.693                                       | 0.762                                         | 0.625                              | 0.470                                |
| 0.6       | 0.850                      | 0.789                        | 0.717                                       | 0.738                                         | 0.639                              | 0.409                                |
| 0.7       | 0.880                      | 0.746                        | 0.708                                       | 0.668                                         | 0.653                              | 0.304                                |
| 0.8       | 0.899                      | 0.696                        | 0.682                                       | 0.477                                         | 0.650                              | 0.239                                |
| 0.85      | 0.909                      | 0.643                        | 0.738                                       | 0.427                                         | 0.647                              | 0.174                                |
| 0.9       | 0.918                      | 0.528                        | 0.713                                       | 0.344                                         | 0.667                              | 0.087                                |
| 0.95      | 0.954                      | 0.401                        | 0.889                                       | 0.297                                         | 0.750                              | 0.051                                |
| 0.99      | 0.957                      | 0.051                        | 1.000                                       | 0.024                                         |                                    | 0.000                                |

Supporting Table S2B. Mean PPV and sensitivity for Fold.

|                       |                         |
|-----------------------|-------------------------|
| Fold canonical<br>PPV | Fold canonical<br>sens. |
| 0.834                 | 0.803                   |

Supporting Table S2C. Mean PPV and sensitivity of MC-Fold.

|                          |                            |                              |                                |
|--------------------------|----------------------------|------------------------------|--------------------------------|
| MC-Fold canonical<br>PPV | MC-Fold canonical<br>sens. | MC-Fold non-canonical<br>PPV | MC-Fold non-canonical<br>sens. |
| 0.809                    | 0.866                      | 0.478                        | 0.623                          |

Supporting Table S2D. Mean PPV and sensitivity of MC-Fold-DP.

|                             |                               |                                 |                                   |
|-----------------------------|-------------------------------|---------------------------------|-----------------------------------|
| MC-Fold-DP canonical<br>PPV | MC-Fold-DP canonical<br>sens. | MC-Fold-DP non-canonical<br>PPV | MC-Fold-DP non-canonical<br>sens. |
| 0.825                       | 0.816                         | 0.448                           | 0.773                             |
